# Supplementary material
Source: publisher figshare collection journal article supplement (https://gsapubs.figshare.com/ndownloader/files/38882310)
Supplement: Supplementary file 1 [file 38882310]

## Sheet: TABLE S2
TABLE S2. CLAST COUNTS
Clast count	Unit	Sum	Crinoid bioclast	Coral bioclast	Chert	Brown chert	Black chert	Red chert	White limestone	Light limestone	Gray limestone	Dark gray limestone	Black limestone	Pink mudstone	Black calc-arenite	Black concretion	Brown siltstone	Tan siltstone	Orange siltstone	Purple siltstone	Silicified bioclast	Tan limestone	Bioclastic LS, light	Bioclastic LS, dark	Red mudstone
2.1-CC1	IPdh1a	84	16	0	0	2	4	0	1	6	2	9	7	0	0	0	9	24	0	1	3	0	0	0	0
2.3-CC3	PIPdh4	171	13	0	5	0	0	0	0	34	0	102	0	0	0	0	0	16	1	0	0	0	0	0	0
2.3-CC2	PIPdh4	191	19	0	25	0	0	0	0	8	0	135	0	1	0	0	0	3	0	0	0	0	0	0	0
2.3-CC1	IPdh2	147	0	0	0	3	0	3	4	2	0	134	0	0	0	0	0	0	0	1	0	0	0	0	0
2.2-CC3	PIPdh4	132	22	0	0	4	12	0	3	2	0	62	7	0	1	0	0	16	0	0	1	2	0	0	0
2.2-CC2	PIPdh4	210	35	0	21	0	0	0	0	8	1	121	0	0	0	0	0	20	0	0	4	0	0	0	0
2.2-CC1	PIPdh4	204	22	1	12	0	0	0	0	2	0	154	0	0	0	0	0	13	0	0	0	0	0	0	0
2.1-CC2	IPdh1a	112	3	1	3	2	3	0	0	36	3	24	0	0	0	0	3	17	0	0	17	0	0	0	0
5.1 CC1	PIPut	120	5	0	1	0	0	0	0	43	0	54	0	0	0	0	3	0	0	0	3	0	11	0	0
5.2 CC1	PIPut	126	2	0	0	0	0	0	0	55	0	29	0	0	0	0	0	0	0	0	9	0	17	13	1
5.4 CC1	PIPut	105	5	0	0	0	0	0	2	29	0	50	0	0	0	0	9	0	0	0	6	0	4	28	0
3.1-CC1	Po	92	0	0	0	0	4	0	0	40	0	36	0	3	0	0	0	0	0	0	0	9	0	0	0
3.1-CC2	Po	114	0	0	0	15	0	0	0	22	0	55	0	0	0	0	0	22	0	0	0	0	0	0	0
3.1-CC3	Po	108	22	5	0	0	0	0	0	37	0	0	0	0	0	40	0	4	0	0	0	0	0	0	0
1.1-CC1	Po	156	10	0	1	0	0	0	0	0	0	0	0	0	5	140	0	0	0	0	0	0	0	0	0
